# Supplementary material for: Antisense oligonucleotides modulate aberrant inclusion of poison exons in SCN1A-related Dravet syndrome
Source: JCI Insight. 2025 Feb 13;10(7):e188014. doi: 10.1172/jci.insight.188014 (PMC11981616; doi:10.1172/jci.insight.188014)
Supplement: Supporting data values [file jciinsight-10-188014-s150.xlsx]

## Sheet: Fig. 2A
Poison exon	Developmental stage	PSI (%)
1N	13 pcw	0
1N	15 pcw	1.8391
1N	18 pcw	0.1883
1N	23 pcw	0.3962
1N	1 mo	0.3602
1N	3 yo	0.2998
1N	Adult #1	0.0338
1N	Adult #2	0.0396
20N	13 pcw	73.5577
20N	15 pcw	65.3527
20N	18 pcw	47.9903
20N	23 pcw	81.4266
20N	1 mo	61.6947
20N	3 yo	50.7502
20N	Adult #1	3.5469
20N	Adult #2	4.0161
22N	13 pcw	0.8343
22N	15 pcw	0.2045
22N	18 pcw	0.4811
22N	23 pcw	0.7018
22N	1 mo	0.4184
22N	3 yo	2.6019
22N	Adult #1	0.057
22N	Adult #2	0

## Sheet: Fig. 2B
Poison exon	PSI (%) - Vehicle	PSI (%) - 11J
1N	0.3411	0.9085
1N	0.1824	0.8391
1N	0.2155	0.4367
1N	0.306	0.4979
1N	0.3262	0.9047
1N	0.3229	1.1611
20N	74.8042	89.4231
20N	75.1852	91.9261
20N	73.6325	91.0314
20N	72.9369	90.1427
20N	77.2379	89.099
20N	77.1144	91.2689
22N	1.423	1.4655
22N	0.4932	0.8712
22N	0.9682	0.5556
22N	0.6083	1.0904
22N	0.6305	0.4415
22N	0.8589	1.2731

## Sheet: Fig. 3B
dCt (control)	dCt (variant)
9.79571	3.7963
9.81695	4.20826
9.95508	3.93111
9.2	2.18
9.51	4.88

## Sheet: Fig. 3D
dCt (variant + no ASO)	dCt (variant + ASO1)	dCt (variant + ASO2)	dCt (variant + ASO scr)
3.86327	4.92078	4.3635	3.3547
3.87873	5.31374	4.14753	3.29367
3.7978	5.26955	4.33382	3.27833
3.50316	5.08379	4.44271	3.50531
3.77864	5.12381	4.23472	3.30164

## Sheet: Fig. 4B
PSI % (control)	PSI % (variant)
0	5.3239
0.5128	6.2849
0.0706	3.5052
0	4.5891
0.4664	3.1519
0.6438	3.6573

## Sheet: Fig. 4D
Variant-to-wild type allele splice ratio
5.3846
8.8889
15.5
7.4
7.25
34

## Sheet: Fig. 5B
PSI % (variant + vehicle)	PSI % (variant + 11J)
5.3971	12.3315
4.5818	10.8011
4.943	10.6578
3.4321	13.1002
4.9133	9.2471
3.0493	13.1236

## Sheet: Fig. 5C
Splice ratio (variant + vehicle)	Splice ratio (variant + 11J)
5.3636	5.3103
4.1667	5.4783
7.125	6.9375
9.75	4.525
10.3333	4.381
5.5	5.8

## Sheet: Fig. 6C
Condition	Fractional of total SCN1A - canonical	Fractional of total SCN1A - 1N
WT	0.919002	0.0809979
WT	0.905397	0.0946026
WT	0.945891	0.054109
WT	0.952631	0.0473688
WT	0.911897	0.0881025
WT	0.911777	0.0882231
No ASO	0.474836	0.525164
No ASO	0.489071	0.510929
No ASO	0.51161	0.48839
No ASO	0.508342	0.491658
No ASO	0.505164	0.494836
No ASO	0.511674	0.488326
ASO_EK	0.763237	0.236763
ASO_EK	0.77743	0.22257
ASO_EK	0.796896	0.203104
ASO_EK	0.706695	0.293305
ASO_EK	0.716221	0.283779
ASO_EK	0.694167	0.305833
ASO_EK	0.75353	0.24647
ASO_SS	0.524451	0.475549
ASO_SS	0.540385	0.459615
ASO_SS	0.484865	0.515135
ASO_SS	0.471023	0.528977
ASO_SS	0.516737	0.483263
ASO_SS	0.515614	0.484386
ASO_SS	0.477072	0.522928
ASO (scr)	0.423018	0.576982
ASO (scr)	0.439001	0.560999
ASO (scr)	0.473408	0.526592
ASO (scr)	0.494371	0.505629
ASO (scr)	0.458568	0.541432
ASO (scr)	0.43122	0.56878
ASO (scr)	0.435001	0.564999

## Sheet: Fig. 6D
PSI (%) - Patient (no ASO)	PSI (%) - Patient (ASO_EK)	PSI (%) - Patient (ASO_scr)
5.93714	1.4386	6.81115
6.231	1.19409	6.38879
7.72557	1.95572	5.04988
3.38219	1.22675	6.71513
3.6994	0.9886	2.2669
5.6724	1.508

[truncated: 7 more sheets: Fig. 6F, Fig. S2B, Fig. S2C, Fig. S5, Fig. S7B, Fig. S7C, Fig. S7D]
